# Supplementary material for: Evaluation of the new capture vaporizer for Aerosol Mass Spectrometers (AMS)through laboratory studies of inorganic species
Source: Copernicus journal article supplement (doi:10.5194/amt-2016-337), 2016-11-09
Supplement: Supplementary file 1 [file amt-2016-337-supplement.pdf]

**Supporting information for “Evaluation of the new capture vaporizer for Aerosol Mass Spectrometers (AMS) through laboratory studies of inorganic species”**

Weiwei Hu<sup>1,2</sup>, Pedro Campuzano-Jost<sup>1,2</sup>, Douglas A. Day<sup>1,2</sup>, Philip Croteau<sup>3</sup>, Manjula R. Canagaratna<sup>3</sup>, John T. Jayne<sup>3</sup>, Douglas R. Worsnop<sup>3</sup>, Jose L. Jimenez<sup>1,2\*</sup>

1 Cooperative Institute for Research in the Environmental Sciences (CIRES), University of Colorado at Boulder, 216 UCB, Boulder, CO 80309, USA

2 Department of Chemistry & Biochemistry, University of Colorado at Boulder, 216 UCB, Boulder, CO 80309, USA

3 Aerodyne Research, Inc., Billerica, Massachusetts, USA

Correspondence to: J. L. Jimenez (jose.jimenez@colorado.edu)

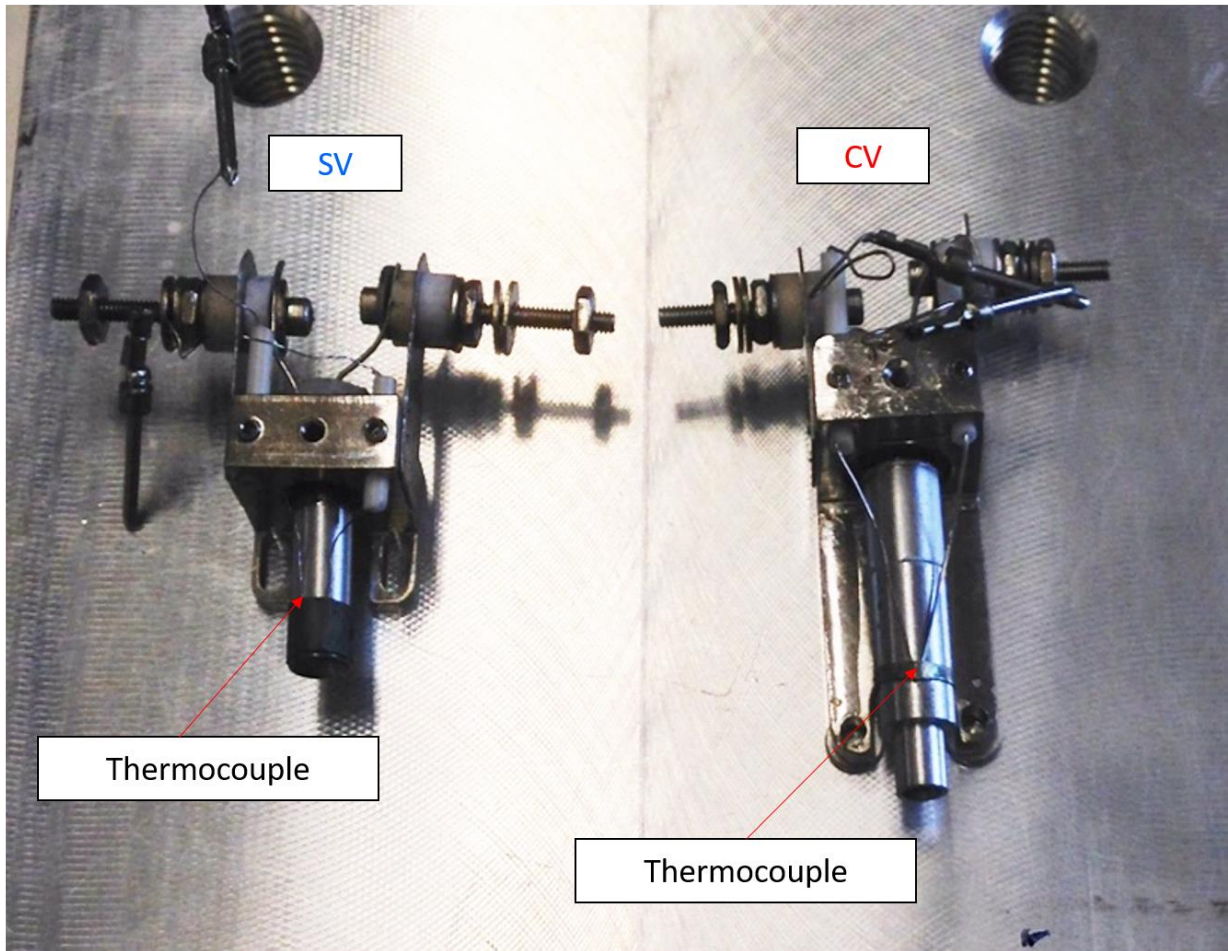

Figure S1. Picture of a standard vaporizer (SV, left) and a capture vaporizer (CV, right).

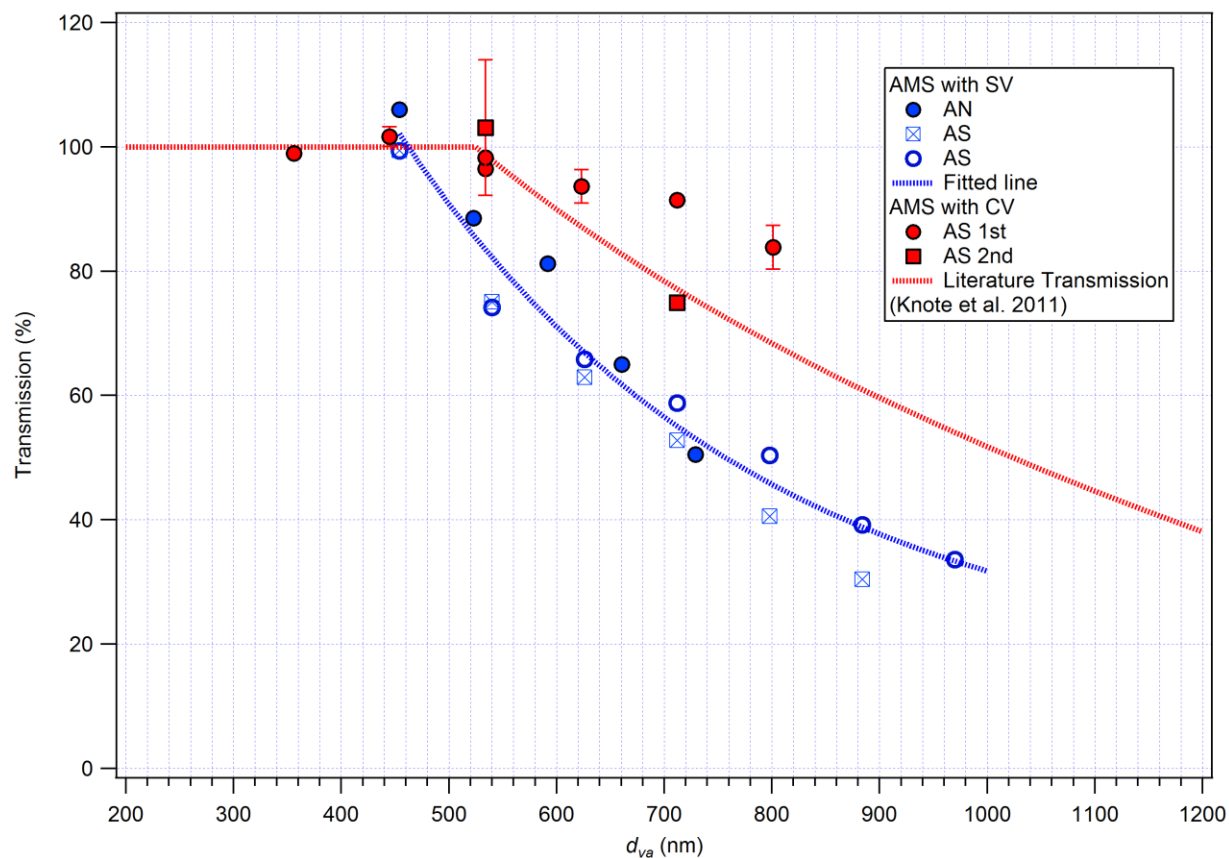

Figure S2. Lens transmission curve measured in this study for the AMSs with CV and SV. For  $d_{va}$  below 460 nm in SV AMS and 550 nm in CV AMS, no lens transmission correction was needed ( $E_L=1$ ). In the experiments shown in this study, only  $\text{NaNO}_3$  needs a transition loss correction for its high  $d_{va}$  (=680nm). During the experiment, an underperforming lens (that has since been replaced) was used in AMS with SV, thus showed a larger particle loss than the AMS with CV at high  $d_{va}$ . Normally, lens transmission curve is similar to that from CV AMS in this study, however individual AMS lens transmission calibrations are always recommended.
