# Supplementary material for: Evaluation of the new capture vaporizer for Aerosol Mass Spectrometers (AMS)through laboratory studies of inorganic species
Source: Copernicus journal article supplement (doi:10.5194/amt-2016-337), 2016-11-09
Supplement: Supplementary file [file amt-2016-337-AC2-supplement.pdf]

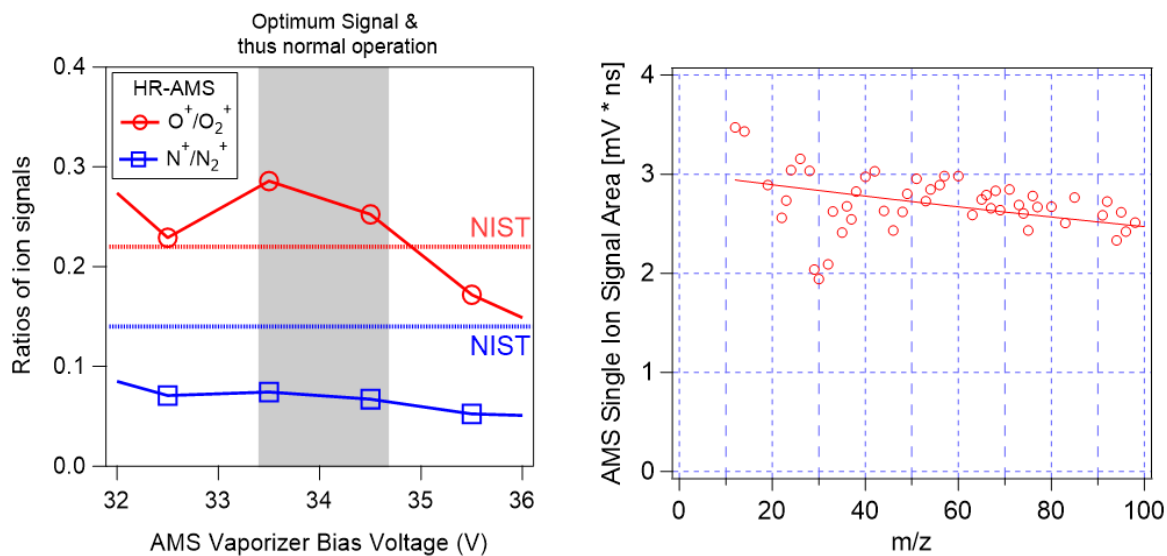

**Figure S6** Left: comparison of the fragmentation patterns of  $O_2$  and  $N_2$  in the HR-AMS to those in the NIST database. Right: measured response of the AMS microchannel plate to single ions as a function of  $m/z$ . Only  $m/z$  at which the signal is dominated by individual ions events, based on ion detection frequencies while analyzing the AMS background signal, are shown.

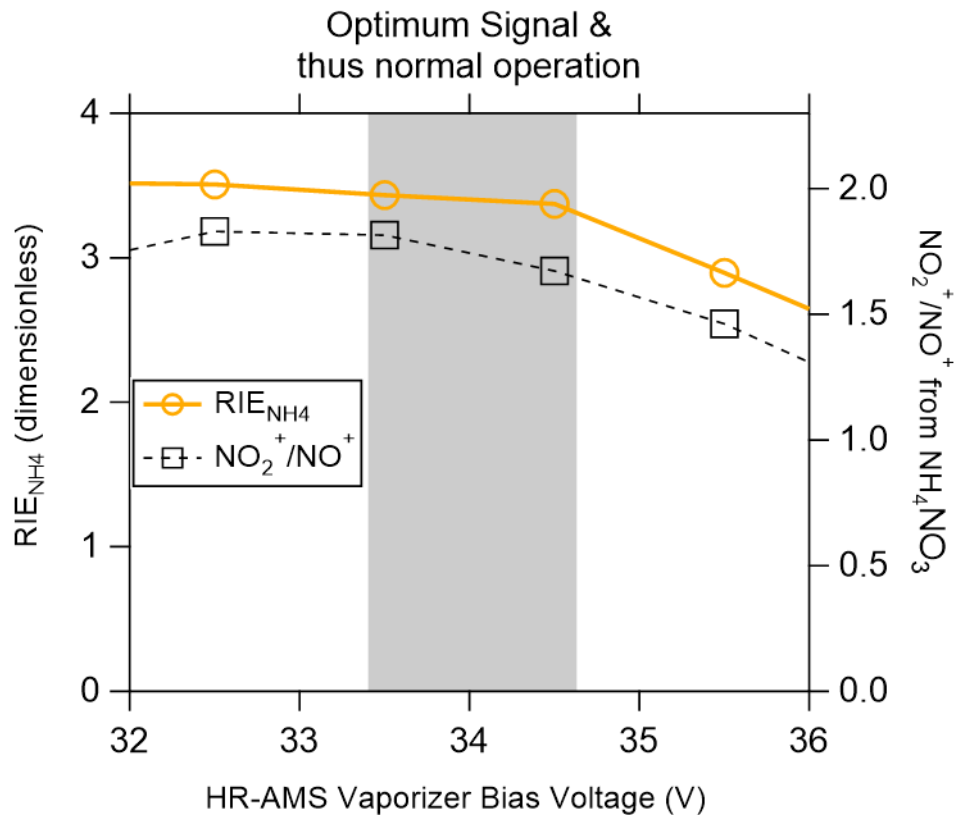

**Figure S7** Variation of  $RIE_{NH_4}$  and the  $NO_2^+/NO^+$  ratio as a function of HR-AMS vaporizer bias voltage while sampling pure  $NH_4NO_3$  particles. Only ~2% variation is observed for  $RIE_{NH_4}$  across the optimum tuning region, while ~8% variation is observed for the  $NO_2^+/NO^+$  ratio.
